# Supplementary material for: Sapropterin (BH4) Aggravates Autoimmune Encephalomyelitis in Mice
Source: Springer Nature journal article supplement (doi:10.1007/s13311-021-01043-4), 2021-04-12
Supplement: MOESM15 [file 13311_2021_1043_MOESM15_ESM.pdf]

# Supplement to

## Sapropterin (BH4) aggravates autoimmune encephalomyelitis in mice

Katja Schmitz<sup>1</sup>, Sandra Trautmann<sup>1</sup>, Lisa Hahnefeld<sup>1</sup>, Caroline Fischer<sup>1</sup>, Yannick Schreiber<sup>1</sup>, Robert Brunkhorst<sup>2</sup>, Ernst R. Werner<sup>3</sup>, Katrin Watschinger<sup>3</sup>, Sabine Wicker<sup>4</sup>, Dominique Thomas<sup>1</sup>, Gerd Geisslinger<sup>1,5,6</sup>, Irmgard Tegeder<sup>1</sup>

### Summary

Depletion of the enzyme cofactor, tetrahydrobiopterin (BH4) in T-cells was shown to prevent their proliferation upon receptor stimulation in models of allergic inflammation in mice suggesting that BH4 drives autoimmunity. Hence, the clinically available BH4 drug (sapropterin) might increase the risk of autoimmune diseases. The present study assessed the implications for multiple sclerosis (MS) as an exemplary CNS autoimmune disease. Plasma levels of biopterin were persistently low in MS patients and tended to be lower with high Expanded Disability Status Scale (EDSS). Instead, the bypass product, neopterin was increased. The deregulation suggested that BH4 replenishment might further drive the immune response or beneficially restore the BH4 balances. To answer this question, mice were treated with sapropterin in immunization-evoked autoimmune encephalomyelitis (EAE), a model of multiple sclerosis. Sapropterin-treated mice had higher EAE disease scores associated with higher numbers of T-cells infiltrating the spinal cord, but normal T-cell subpopulations in spleen and blood. Mechanistically, sapropterin-treatment was associated with increased plasma levels of long-chain ceramides and low levels of the poly-unsaturated fatty acid, linolenic acid (FA18:3). These lipid changes are known to contribute to disruptions of the blood brain barrier in EAE mice. Indeed, RNA data analyses revealed upregulations of genes involved in ceramide synthesis in brain endothelial cells of EAE mice (LASS6/CERS6, LASS3/CERS3, UGCG, ELOVL6 and -4). The results support the view that BH4 fortifies autoimmune CNS disease, mechanistically involving lipid deregulations that are known to contribute to the EAE pathology.

## Suppl. Table 1A

Demographic data of MS patients and Healthy Controls with serum samples

|                                        | Patients with Multiple Sclerosis, serum samples |          |                    |           |                    |          |                    |          | Healthy Controls (HC) |            |
|----------------------------------------|-------------------------------------------------|----------|--------------------|-----------|--------------------|----------|--------------------|----------|-----------------------|------------|
|                                        | First course                                    |          | RRMS stable        |           | RRMS acute relapse |          | SPMS or PPMS       |          | female                | male       |
|                                        | female                                          | male     | female             | male      | female             | male     | female             | male     |                       |            |
| Gender                                 |                                                 |          |                    |           |                    |          |                    |          |                       |            |
| Age (mean)                             | 31.64                                           | 38.23    | 34.3               | 35.48     | 37.16              | 33.85    | 49.25              | 43.57    | 24.9                  | 25.03      |
| Age (SD)                               | 9.14                                            | 7.52     | 8.87               | 9.41      | 10.91              | 7.03     | 10.96              | 18.08    | 6.08                  | 6.13       |
| Disease years (mean)                   | 0.88                                            | 0.1      | 7.41               | 7.55      | 6.68               | 2.08     | 1.05               | 5.67     |                       |            |
| Disease years (SD)                     | 2.87                                            | 0.04     | 5.86               | 6.1       | 5.27               | 1.77     | 1.34               | 4.67     |                       |            |
|                                        | Number of patients                              |          | Number of patients |           | Number of patients |          | Number of patients |          | Number of HC          |            |
| No drug                                | 11                                              | 6        | 6                  | 3         | 10                 | 1        | 1                  | 1        | 183                   | 118        |
| Interferon                             | 0                                               | 0        | 11                 | 6         | 5                  | 2        | 1                  | 0        |                       |            |
| Fingolimod                             | 0                                               | 0        | 5                  | 3         | 1                  | 0        | 0                  | 1        |                       |            |
| Natalizumab                            | 0                                               | 0        | 15                 | 4         | 0                  | 0        | 0                  | 0        |                       |            |
| Other (e.g. glatiramer, fumarate, AZA) | 1                                               | 2        | 2                  | 0         | 2                  | 1        | 0                  | 1        |                       |            |
| <b>Total</b>                           | <b>12</b>                                       | <b>8</b> | <b>39</b>          | <b>16</b> | <b>18</b>          | <b>4</b> | <b>2</b>           | <b>3</b> | <b>183</b>            | <b>118</b> |
| <b>Sum</b>                             |                                                 |          |                    |           |                    |          |                    |          | <b>102</b>            | <b>301</b> |

## Suppl. Table 1B

Demographic data of MS patients of cohort-2 for individual time courses

| Days | Day of diagnosis set to 0 | Therapy    | Clinical    | Pat# | Sample | Patient | Biopterin (ng/ml) | Neopterin (ng/ml) |
|------|---------------------------|------------|-------------|------|--------|---------|-------------------|-------------------|
| 426  | 0                         | Steroid    | Relapse     | #1   | 1      | A       | 1.067             | 4.949             |
| 576  | 150                       | NTZ        | preRelapse  | #1   | 2      | A       | 0.898             | 3.952             |
| 943  | 517                       | NTZ        | Interval    | #1   | 3      | A       | 1.159             | 5.015             |
| 224  | 0                         | Steroid    | Relapse     | #2   | 4      | B       | 1.238             | 3.966             |
| 404  | 180                       | Steroid    | Relapse     | #2   | 5      | B       | 1.359             | 4.418             |
| 610  | 386                       | Steroid    | postRelapse | #2   | 6      | B       | 1.111             | 3.434             |
| 1497 | 1273                      | n.a.       | Interval    | #2   | 7      | B       | 1.214             | 3.227             |
| 518  | 0                         | Fingolimod | preRelapse  | #3   | 8      | C       | 1.436             | 5.211             |
| 562  | 44                        | n.a.       | Relapse     | #3   | 9      | C       | 2.181             | 6.497             |
| 661  | 143                       | Fingolimod | Interval    | #3   | 10     | C       | 2.261             | 5.948             |
| 749  | 231                       | Fingolimod | Interval    | #3   | 11     | C       | 3.545             | 5.982             |
| 254  | 0                         | NTZ        | preRelapse  | #4   | 12     | D       | 1.198             | 5.198             |
| 673  | 419                       | n.a.       | Relapse     | #4   | 13     | D       | 1.77              | 5.661             |
| 742  | 488                       | NTZ        | Interval    | #4   | 14     | D       | 1.451             | 5.487             |
| 937  | 683                       | NTZ        | Interval    | #4   | 15     | D       | 1.305             | 4.688             |
| 199  | 0                         | noTreat    | preRelapse  | #5   | 16     | E       | 1.035             | 4.922             |
| 199  | 0                         | noTreat    | Relapse     | #5   |        |         |                   |                   |
| 765  | 566                       | Fingolimod | Relapse     | #5   | 17     | E       | 2.127             | 4.952             |
| 765  | 566                       | Fingolimod | Relapse     | #5   | 18     | E       | 1.293             | 4.216             |
| 1095 | 896                       | NTZ        | Interval    | #5   |        |         |                   |                   |
| 1187 | 988                       | NTZ        | Interval    | #5   | 19     | E       | 1.183             | 3.863             |
| 1213 | 1014                      | NTZ        | Interval    | #5   | 20     | E       | 1.357             | 4.392             |

|      |      |            |             |     |    |   |       |        |
|------|------|------------|-------------|-----|----|---|-------|--------|
| 1213 | 1014 | NTZ        | Interval    | #5  |    |   |       |        |
| 0    | 0    | NTZ        | preRelapse  | #6  | 21 | F | 1.501 | 3.432  |
| 112  | 112  | n.a.       | Relapse     | #6  | 22 | F | 1.353 | 3.305  |
| 191  | 191  | NTZ        | Interval    | #6  | 23 | F | 1.636 | 3.672  |
| 247  | 247  | NTZ        | Interval    | #6  | 24 | F | 1.749 | 4.291  |
| 213  | 0    | before     | Relapse     | #7  | 25 | G | 1.296 | 9.426  |
| 735  | 522  | before     | Interval    | #7  | 26 | G | 1.604 | 13.299 |
| 915  | 702  | NTZ        | Interval    | #7  | 27 | G | 1.337 | 2.53   |
| 1146 | 933  | NTZ        | Interval    | #7  | 28 | G | 1.473 | 2.976  |
| 1185 | 0    | NTZ        | Interval    | #8  | 29 | H | 0.905 | 7.411  |
| 1254 | 69   | n.a.       | Relapse     | #8  | 30 | H | 1.168 | 4.149  |
| 1405 | 220  | NTZ        | Interval    | #8  | 31 | H | 1.04  | 7.089  |
| 1467 | 282  | NTZ        | Interval    | #8  | 32 | H | 0.92  | 5.817  |
| 529  | 0    | NTZ        | preRelapse  | #9  | 33 | I | 1.432 | 4.168  |
| 638  | 109  | Steroid    | Relapse     | #9  | 34 | I | 2.061 | 3.946  |
| 1124 | 595  | RTX        | postRelapse | #9  | 35 | I | 1.718 | 7.321  |
| 1191 | 0    | NTZ        | preRelapse  | #10 | 36 | J | 1.74  | 4.9    |
| 1383 | 192  | n.a.       | Relapse     | #10 | 37 | J | 1.277 | 3.67   |
| 1405 | 214  | NTZ        | postRelapse | #10 | 38 | J | 1.233 | 4.554  |
| 1472 | 281  | Steroid    | Relapse     | #10 | 39 | J | 1.372 | 4.225  |
| 1490 | 299  | Steroid    | Relapse     | #10 | 40 | J | 1.187 | 5.907  |
| 1566 | 375  | NTZ        | Interval    | #10 | 41 | J | 1.13  | 3.89   |
| 184  | 0    | noTreat    | Interval    | #11 | 42 | K | 1.923 | 2.868  |
| 246  | 62   | Fingolimod | Interval    | #11 | 43 | K | 1.427 | 4.077  |
| 158  | 0    | noTreat    | Relapse     | #12 | 44 | L | 0.917 | 10.296 |
| 350  | 192  | Fingolimod | Interval    | #12 | 45 | L | 1.104 | 6.375  |
| 1185 | 1027 | Fingolimod | Interval    | #12 | 46 | L | 1.183 | 4.562  |
| 1247 | 0    | NTZ        | preRelapse  | #13 | 47 | M | 0.934 | 4.047  |
| 1383 | 136  | n.a.       | Relapse     | #13 | 48 | M | 1.033 | 4.733  |
| 1496 | 249  | NTZ        | Interval    | #13 | 49 | M | 0.949 | 3.39   |
| 494  | 0    | noTreat    | Relapse     | #14 | 50 | N | 1.233 | 5.79   |
| 499  | 5    | Fingolimod | Interval    | #14 | 51 | N | 2.357 | 5.769  |
| 1214 | 720  | Fingolimod | Interval    | #14 | 52 | N | 1.673 | 3.464  |

## Suppl. Table 2

### Antibodies

| <i>Antibody</i> | <i>Type</i> | <i>Host</i> | <i>Conjugate</i> | <i>Company</i>  | <i>Product #</i> |
|-----------------|-------------|-------------|------------------|-----------------|------------------|
| CD11b           | mab         | rat         | unconjugated     | BioRad          | MCA711           |
| CD11b           | mab         | rat         | APC              | Miltenyi Biotec | 130-091-241      |
| CD11b           | mab         | rat         | eFluor 450       | eBioscience     | 48-0112-80       |
| CD11c           | mab         | hamster     | eFluor 450       | eBioscience     | 48-0114-80       |
| CD19            | mab         | rat         | PE               | eBioscience     | 12-0193-82       |
| CD206           | mab         | mouse       | FITC             | Biozol          | BZL 20766        |
| CD25            | mab         | rat         | PE-Cy7           | eBioscience     | 25-0251-81       |
| CD3e            | mab         | hamster     | unconjugated     | BD              | 550275           |
| CD3             | mab         | rat         | APC-Cy7          | BioLegend       | 100330           |
| CD36            | mab         | rat         | PE               | eBioscience     | 12-0361-81       |
| CD4             | mab         | rat         | eFluor 500       | BD              | 560782           |
| CD45            | mab         | rat         | eFluor 450       | eBioscience     | 48-0451-82       |
| CD8             | mab         | rat         | FITC             | eBioscience     | 11-0083-81       |
| F4/80           | mab         | rat         | unconjugated     | eBioscience     | 14-4801-82       |
| F4/80           | mab         | rat         | PE-Cy7           | eBioscience     | 25-4801-82       |
| Iba1            | pab         | rabbit      | unconjugated     | WAKO            | 019-19741        |
| IFN- $\gamma$   | mab         | rat         | AF488            | eBioscience     | 53-7311-82       |
| MHC-II          | mab         | rat         | PerCP-eFluor710  | eBioscience     | 46-5320-80       |
| Ly6C            | mab         | rat         | PerCP-Cy5.5      | eBioscience     | 45-5932-80       |
| Ly6G            | mab         | rat         | APC-Cy7          | BD              | 560600           |
| NeuN            | mab         | mouse       | unconjugated     | Merck Millipore | MAB377           |

## Supplementary figures and legends

### Suppl. Figure 1

#### Tetrahydrobiopterin synthesis and coenzyme functions

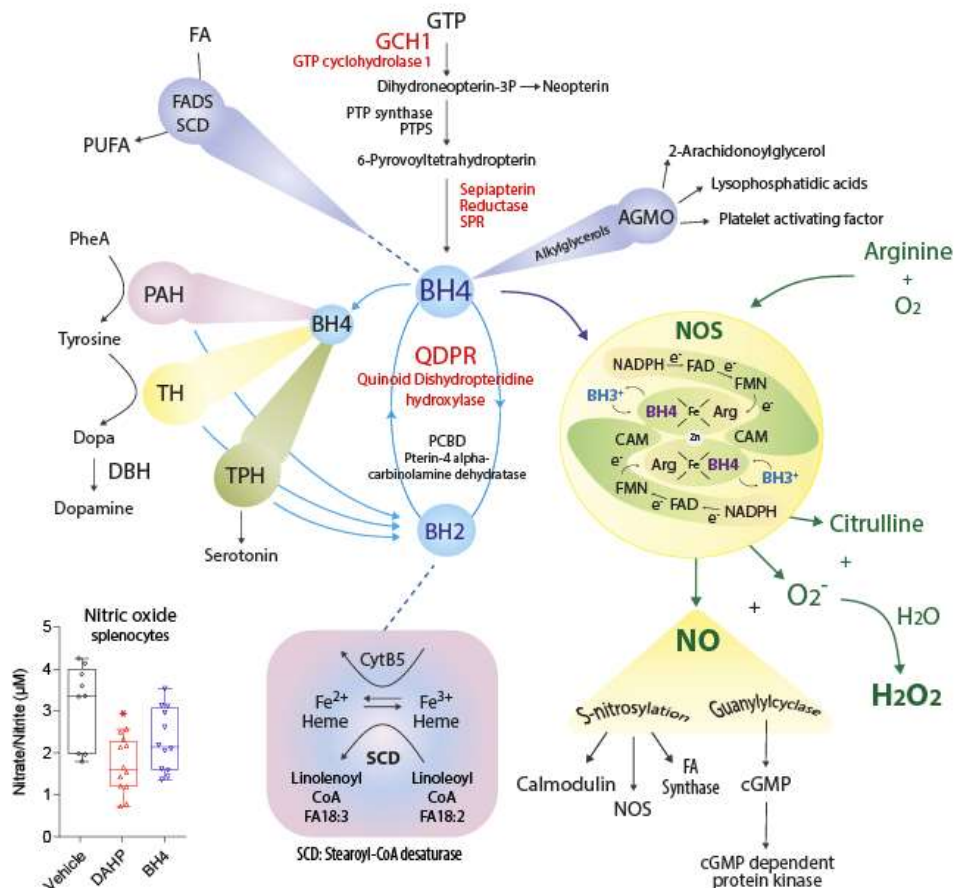

Suppl. Figure 1:

#### Tetrahydrobiopterin synthesis and coenzyme functions and effects of GCH1 inhibition in splenocytes

The graph shows the biosynthesis of tetrahydrobiopterin (BH) and its coenzyme functions and also illustrates putative effects on iron dependent fatty acid metabolism. The box/scatter plot shows nitrite/nitrate levels obtained in the Griess assay in primary splenocytes, which were restimulated with 25 ng/ml IFN $\gamma$ . The spleens were obtained from vehicle, DAHP or sapropterin (BH4) treated SJL/J-EAE mice 22 days after immunization. The box represents the interquartile range, whiskers show minimum to maximum, the line is the median. Data were compared with one-way ANOVA and subsequent posthoc t-test with adjustment of alpha according to Šidák (\* P < 0.05).

Suppl. Figure 2

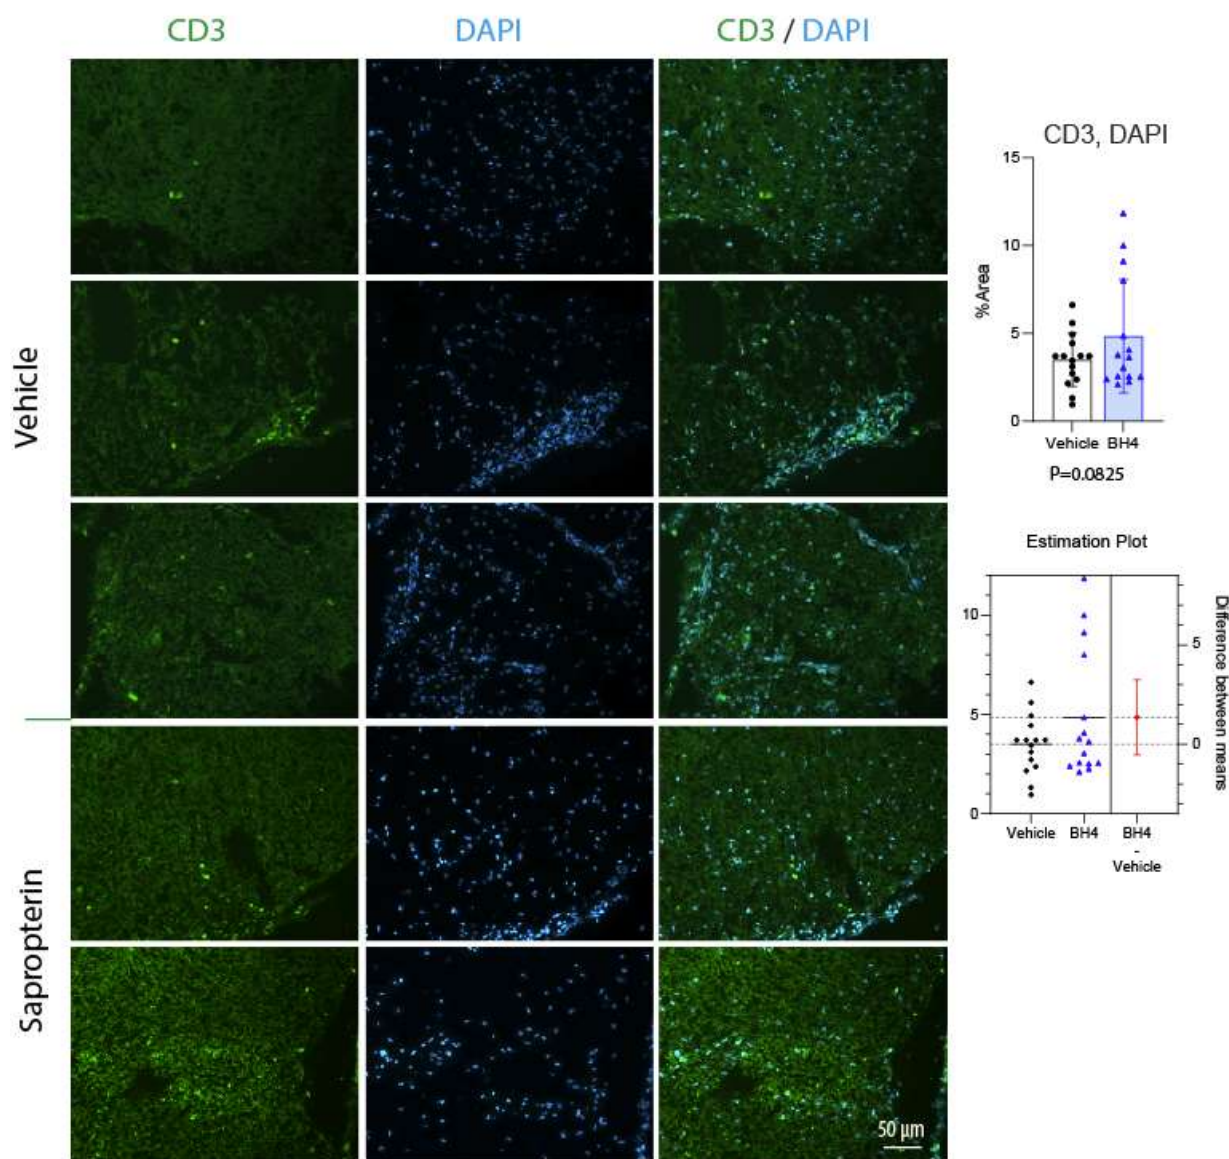

Suppl. Figure 2

### Immunofluorescence of CD3 in spinal cord sections of EAE mice treated with sapropterin or vehicle

Cryosections of the lumbar spinal cord were subjected to immunofluorescence analysis using anti-CD3 antibody to reveal T-cells. CD3 (green) was counterstained with DAPI to reveal nuclei. The right panel shows the merged images. CD3 immunofluorescence signals were quantified in 4-5 sections per mouse of  $n = 3$  mice per treatment group in FIJI ImageJ using the Particle Counter after background subtraction and default threshold settings with minor adjustment. The relative CD3 immunoreactive area (relative to the total image size, equal for all analyses) was used for group comparisons. Data were compared by Student's t-test.



Suppl. Figure 3

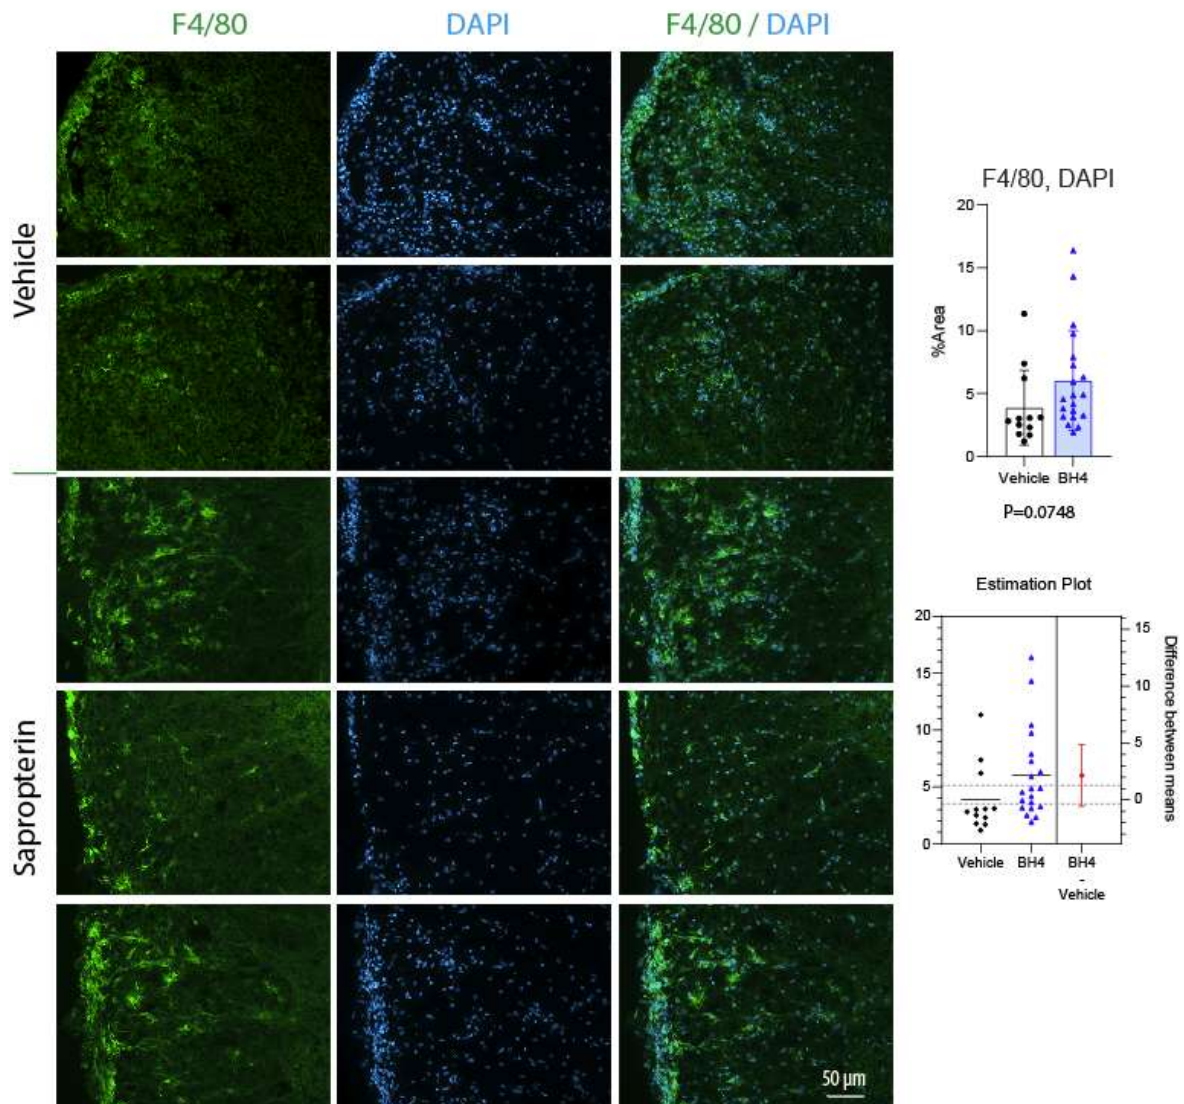

Suppl. Figure 3

**Immunofluorescence of F4/80 in spinal cord sections of EAE mice treated with sapropterin or vehicle**

Cryosections of the lumbar spinal cord were subjected to immunofluorescence analysis using anti-F4/80 antibody to reveal myeloid derived cells. F4/80 (green) was counterstained with DAPI to reveal nuclei. The right panel shows the merged images. The quantification was done as in Suppl. Fig. 2. Data are from 4-5 sections per mouse of 3 mice per group.

Suppl. Figure 4

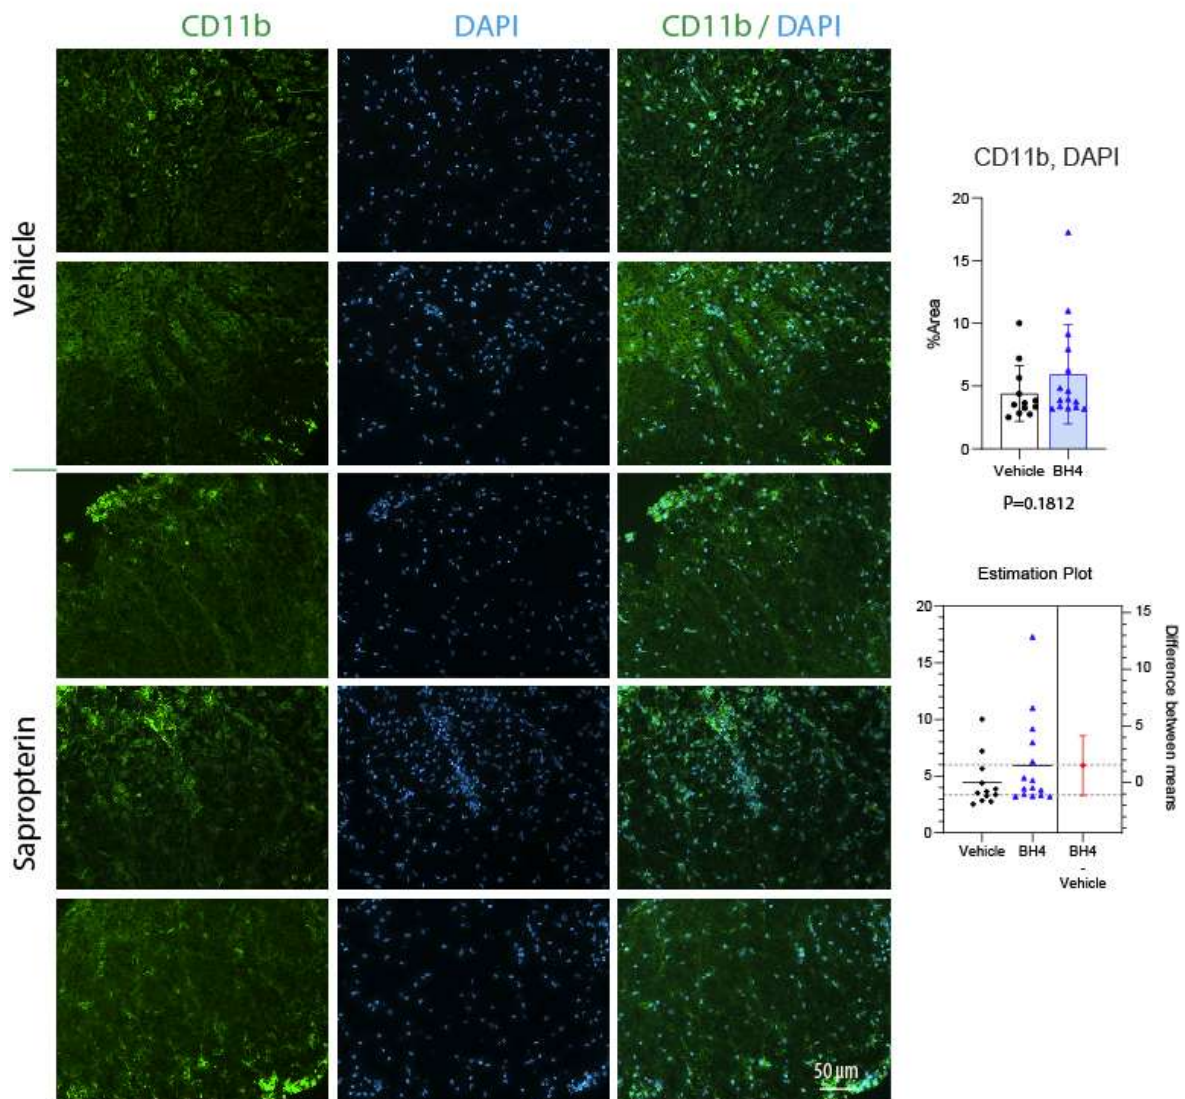

Suppl. Figure 4

**Immunofluorescence of CD11b in spinal cord sections of EAE mice treated with sapropterin or vehicle**

Cryosections of the lumbar spinal cord were subjected to immunofluorescence analysis using anti-CD11b antibody to reveal complement-3 receptor positive myeloid derived cells. Microglia have high CD11b, peripheral macrophages have moderate CD11b expression. CD11b (green) was counterstained with DAPI to reveal nuclei. The right panel shows the merged images. The quantification was done as in Suppl. Fig. 2. Data are (mean  $\pm$  SD) are from 4-5 sections per mouse of 3 mice per group.



Suppl. Figure 5

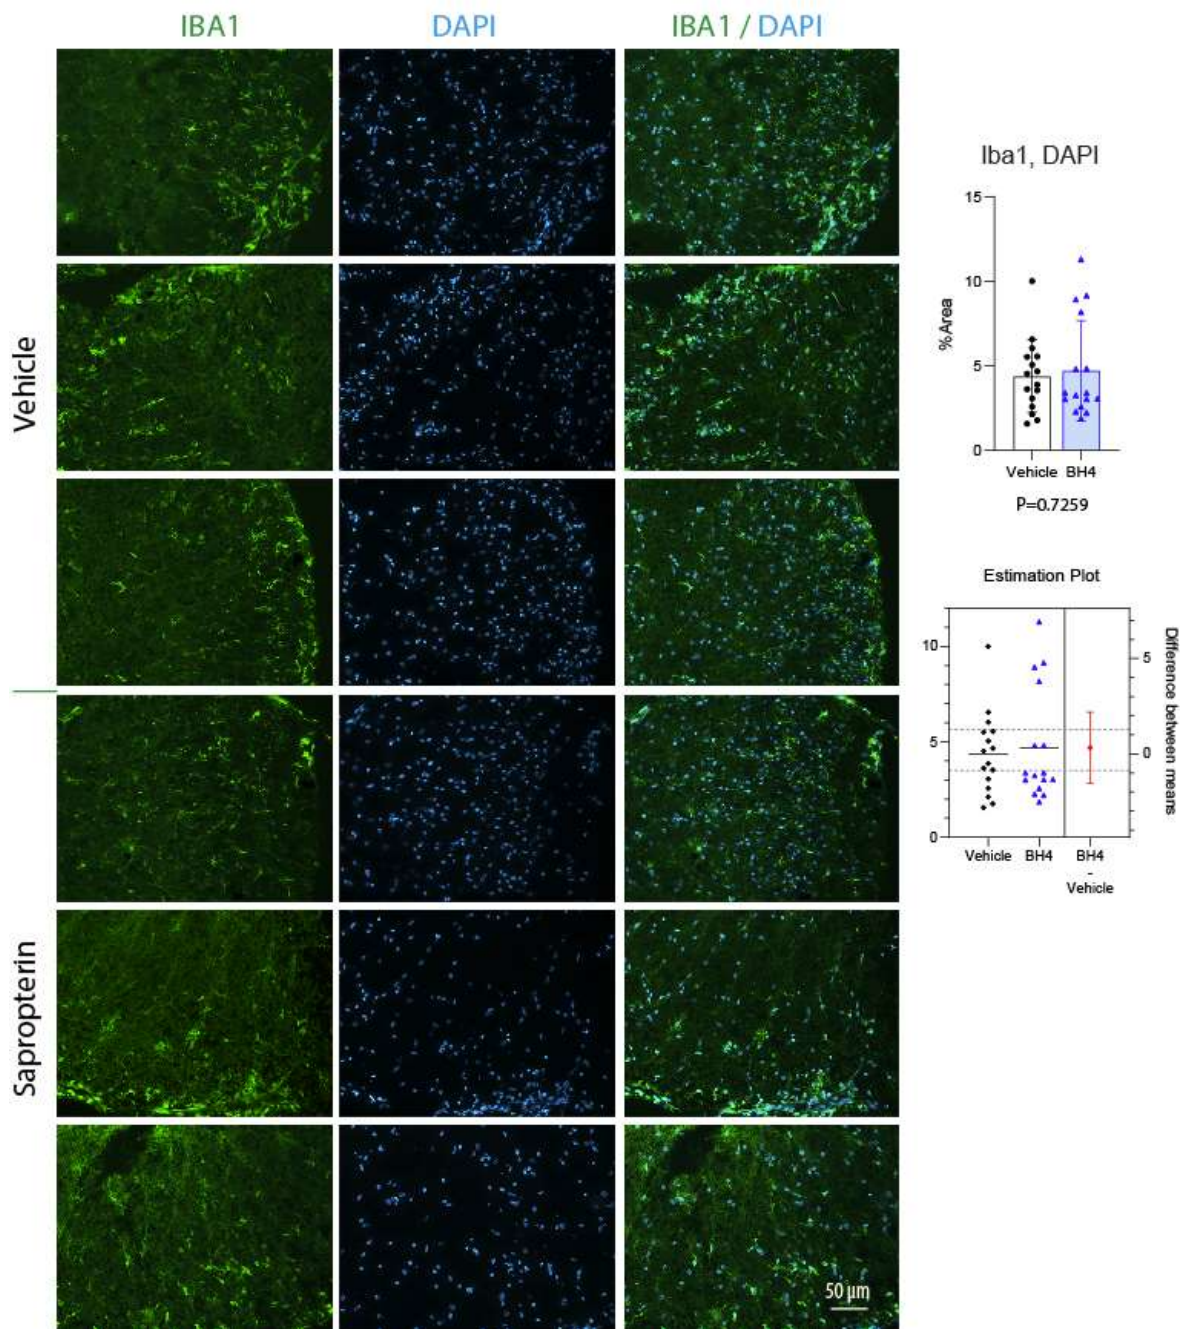

Suppl. Figure 5

**Immunofluorescence of Iba1 in spinal cord sections of EAE mice treated with sapropterin or vehicle**

Cryosections of the lumbar spinal cord were subjected to immunofluorescence analysis using anti-Iba1 antibody to reveal allograft inflammatory factor 1 positive myeloid derived cells. Microglia and infiltrating macrophages express Iba1. Iba1 (green) was counterstained with DAPI to reveal nuclei. The right panel shows the merged images. The quantification was done as in Suppl. Fig. 2. Data are (mean  $\pm$  SD) are from 4-5 sections per mouse of 3 mice per group.

Suppl. Figure 6

SJL mice FACS of spleen, CD4 and myeloid marker

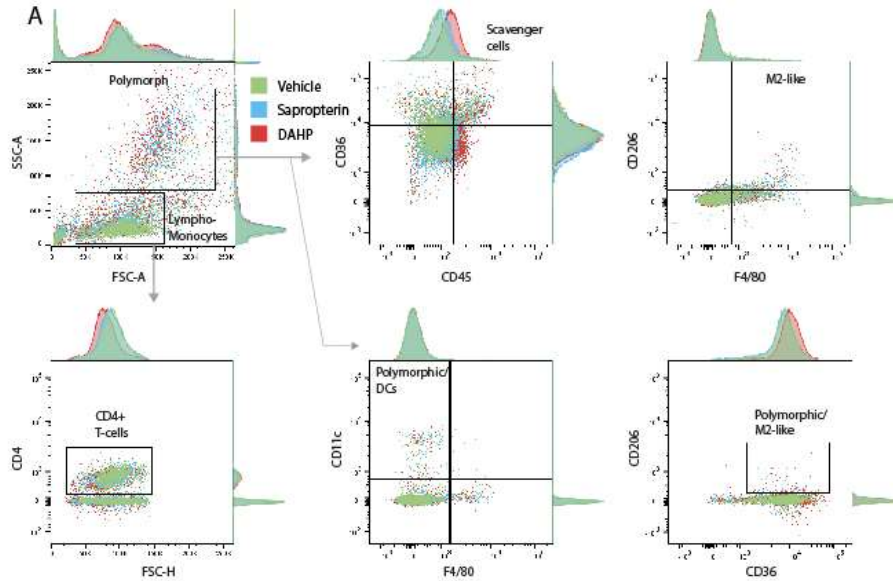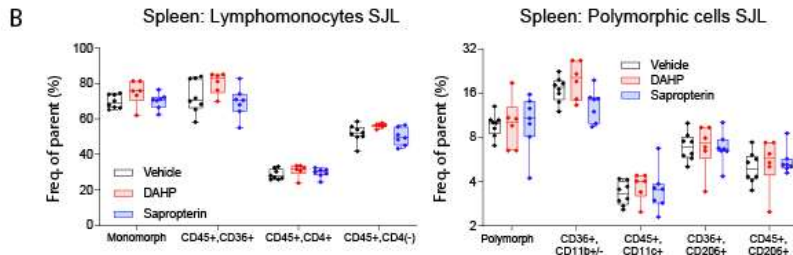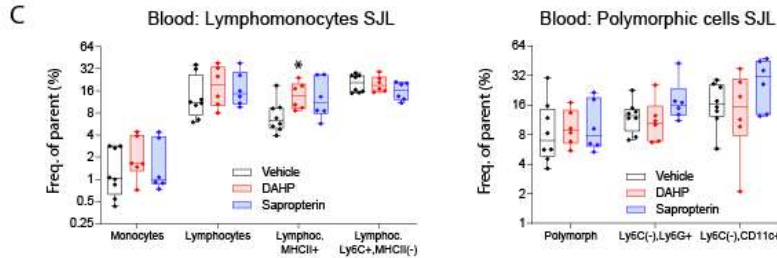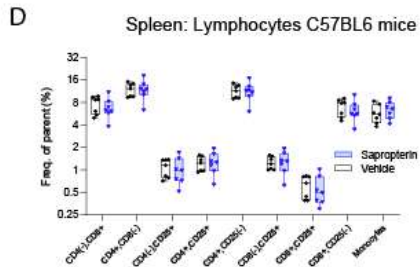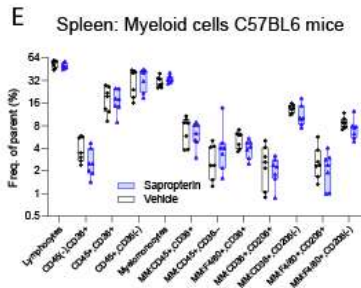

Suppl. Figure 6:

**FACS analyses of lymphocytes and myeloid cells in spleen and blood in EAE mice treated with sapropterin or vehicle**

**A:** Exemplary results of the FACS analysis of the splenocytes from vehicle, DAHP or sapropterin (BH4) treated SJL/J-EAE mice. The tissue was dissected 22 days after immunization. 100000 cells were counted of each 6-8 mice. Exemplary dot plots show splenic cells gated according to forward scatter (FSC) versus sideward scatter (SSC). The framed areas show lympho-/monocytes and a gate of polymorphic cells. The polymorphic cells were further analyzed for CD45/CD36 (scavenger cells) and F4-80/CD206 (M2-like macrophages). Lympho-/monocytes were further analyzed for CD4 (T-cells), F4-80/CD11c (dendritic cells) and CD36/CD206 (M2-like).

**B:** Results of FACS analysis shown in A. The data show the frequency (percentage of the parent population). Data were compared with two-way ANOVA "population X treatment" and subsequent posthoc analysis for treatment using an adjustment of alpha according to Šidák (n = 6-8 per group).

**C:** FACS analyses of circulating blood cells from vehicle, DAHP or sapropterin (BH4) treated SJL/J-EAE mice. Statistics as in B.

**D:** FACS analysis of splenocytes for lymphocytic subpopulations from vehicle or sapropterin (BH4) treated C57Bl6/J-EAE mice. The tissue was dissected 19 days after immunization. 100000 cells were counted of each 7 mice. There was no difference between groups.

Suppl. Fig. 7

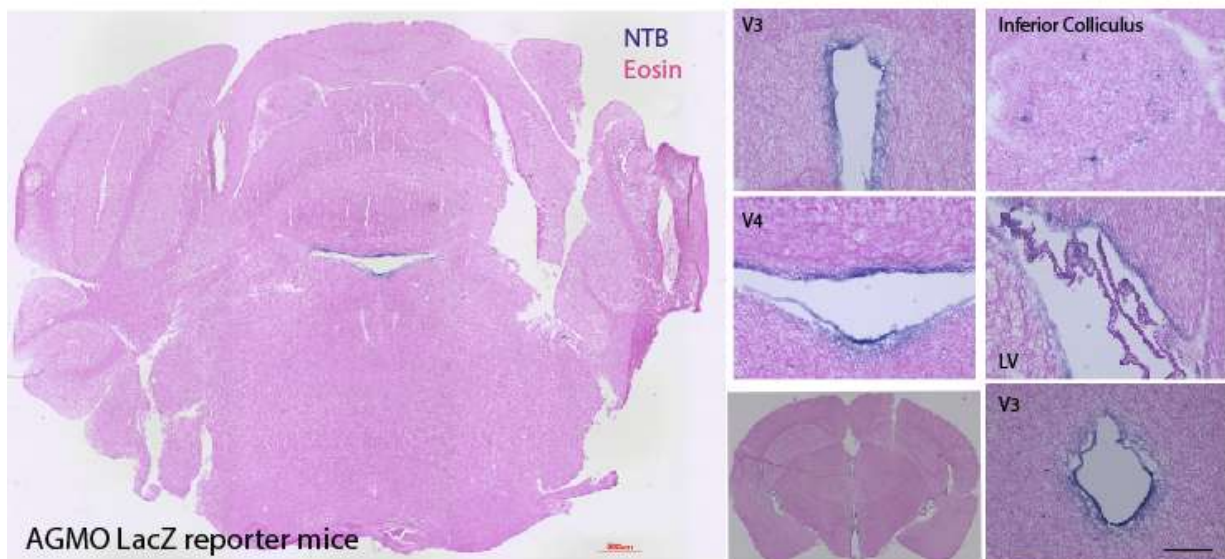

Suppl. Figure 7

Exemplary images of nitrotetrazolium blue (NTB) staining of the brain of adult AGMO LacZ reporter mice. AGMO expressing cells are blue. Sections were counterstained with eosin (red). Scale bar 500  $\mu$ m (overview) or 100  $\mu$ m. V, Ventricle.



Suppl. Fig. 8

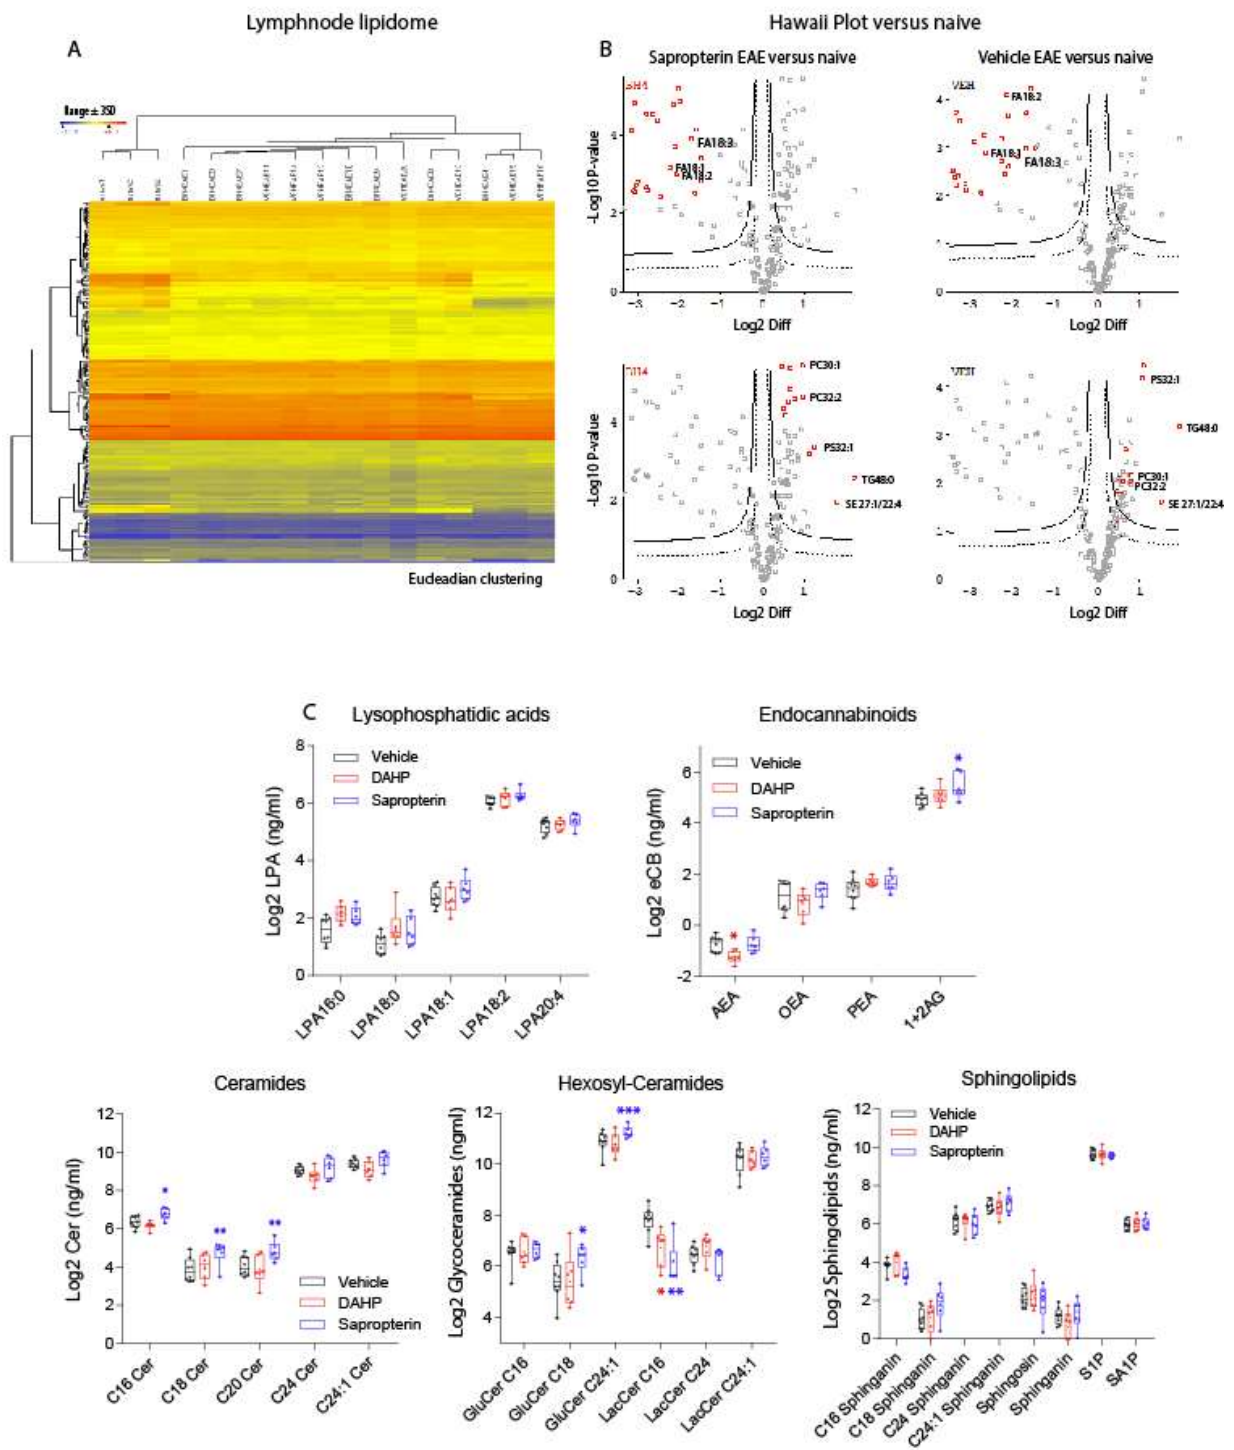

## Suppl. Figure 8

**A:** Heatmap of the lymph node lipidome of naïve C57BL6 and EAE mice treated with sapropterin or vehicle. Treatment was started at the day of immunization and tissue was dissected 19 days after immunization. Lipid concentrations are color-coded (red high, blue low, color bar in the top right corner). Lipids and mice were clustered using Euclidean distance metrics. Dendrograms show lipid (rows) and mouse clusters (columns). Naïve mice were separated from EAE mice but sapropterin and vehicle treated mice were similar.

**B:** Hawaii plots show the lymph node lipidome of sapropterin treated and vehicle treated of EAE mice, versus naïve mice. The upper row highlights reduced lipids in EAE (red), the bottom row highlights increased lipids. Each plot is a Volcano plot that shows the Log<sub>2</sub> difference (= fold difference; X-axis) versus the negative logarithm of the t-test P value (Y-axis). Some candidates are labeled with the standard lipid name.

**C:** Box/scatter plots of plasma lipids of various classes in vehicle, DAHP or sapropterin (BH4) treated SJL/J-EAE mice. The box represents the interquartile range, whiskers show minimum to maximum, the line is the median. Each scatter is a mouse. Data were compared with two-way ANOVA for "lipid X treatment" and subsequent posthoc analysis for treatment using an adjustment of alpha according to Šidák (n = 6-8 per group, \* P < 0.05, \*\* P < 0.001).

## References

[1] Munji RN, Soung AL, Weiner GA, et al. Profiling the mouse brain endothelial transcriptome in health and disease models reveals a core blood-brain barrier dysfunction module. *Nat. Neurosci.* 2019;22(11): 1892-1902.
